# Supplementary material for: Ag-catalyzed azide alkyne cycloaddition: a DFT approach
Source: Royal Society of Chemistry journal article supplement (doi:10.1039/c5dt04902d), 2016-01-01
Supplement: c5dt04902d1.pdf [file c5dt04902d1.pdf]

# Supporting Information for

## Ag-Catalyzed Azide Alkyne Cycloaddition: A DFT Approach

Esra Boz<sup>a</sup>, Nurcan Ş. Tüzün<sup>a\*</sup>

<sup>a</sup> Department of Chemistry, Istanbul Technical University, 34469, Istanbul, Turkey

---

---

### Contents

---

---

|                                                                                                                                                                                                                    |   |
|--------------------------------------------------------------------------------------------------------------------------------------------------------------------------------------------------------------------|---|
| Benchmark Study .....                                                                                                                                                                                              | 3 |
| Figure S1. Critical distances in the X-ray crystal structures of Complex_1 and Complex_2 [23] .....                                                                                                                | 3 |
| Formula S1. Percent mean relative error. (the estimated value denoted by <i>e</i> , was compared with the measured value, which is denoted by <i>m</i> and number of observations are denoted by <i>n</i> .) ..... | 3 |
| Table S1. Critical bond length deviations in Complex_1 and Complex_2 (in parenthesis) structures. ....                                                                                                             | 4 |
| Uncatalyzed Reaction .....                                                                                                                                                                                         | 4 |
| Figure S2. Uncatalyzed reaction barriers for model and real systems .....                                                                                                                                          | 4 |
| CARTESIAN COORDINATES OF THE STRUCTURES .....                                                                                                                                                                      | 5 |
| Ag <sub>1</sub> _A_M .....                                                                                                                                                                                         | 5 |
| Ag <sub>1</sub> _TS <sub>AD</sub> _M .....                                                                                                                                                                         | 5 |
| Ag <sub>1</sub> _D_M .....                                                                                                                                                                                         | 6 |
| Ag <sub>1</sub> _A_R .....                                                                                                                                                                                         | 6 |
| Ag <sub>1</sub> _TS <sub>AD</sub> _R .....                                                                                                                                                                         | 7 |
| Ag <sub>1</sub> _D_R .....                                                                                                                                                                                         | 8 |
| Methyl azide .....                                                                                                                                                                                                 | 9 |

|                                                                                                  |    |
|--------------------------------------------------------------------------------------------------|----|
| Benzyl azide .....                                                                               | 10 |
| $\mu^2$ - $\eta_1$ - $\eta_2$ coordination of the silver (I) acetylide (lamellar structure)..... | 10 |
| Ag <sub>2</sub> _A_M .....                                                                       | 11 |
| Ag <sub>2</sub> _TS <sub>AC</sub> _M_1 .....                                                     | 12 |
| Ag <sub>2</sub> _TS <sub>AC</sub> _M_2.....                                                      | 13 |
| Ag <sub>2</sub> _TS <sub>AD</sub> _M_3.....                                                      | 14 |
| Ag <sub>2</sub> _C_M .....                                                                       | 15 |
| Ag <sub>2</sub> _TS <sub>CD</sub> _M.....                                                        | 15 |
| Ag <sub>2</sub> _TS <sub>CD</sub> _R.....                                                        | 21 |
| Ag <sub>2</sub> _D_R .....                                                                       | 22 |
| Ag <sub>2</sub> _A_RL.....                                                                       | 23 |
| Ag <sub>2</sub> _TS <sub>AD</sub> _RL .....                                                      | 25 |
| Ag <sub>2</sub> _D_RL.....                                                                       | 27 |
| Ag <sub>1</sub> _A_RL.....                                                                       | 29 |
| Ag <sub>1</sub> _TS <sub>AD</sub> _RL .....                                                      | 30 |
| Ag <sub>1</sub> _D_RL.....                                                                       | 32 |

## Benchmark Study

Firstly, we investigated optimized silver catalyst structures of the Complex\_1 and Complex\_2 (Figure S1) by using different functionals (B3LYP, BPW91, M06L, wb97xd) and basis sets (6-31+G\*, 6-311+G\* with Lanl2dz, SDD, MWB as effective core potential). Then, critical distances in these complexes are compared to the ones in the X-ray crystal structures shown in Figure S1.

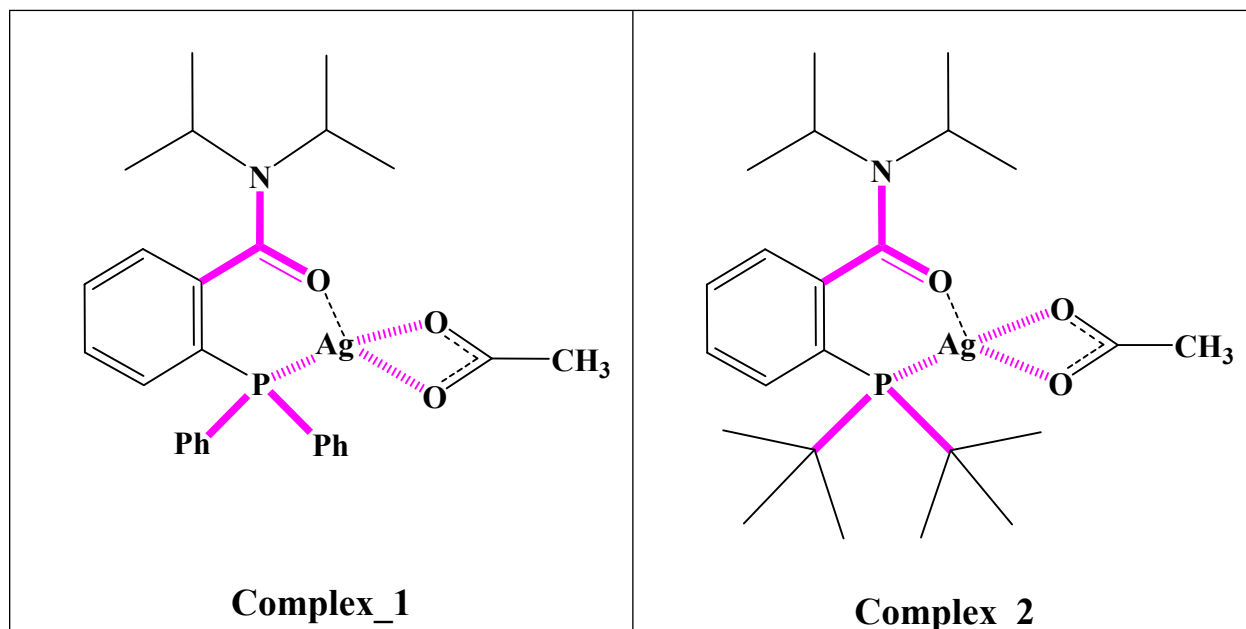

**Figure S1.** Critical distances in the X-ray crystal structures of Complex\_1 and Complex\_2 [23]

For each method, percent mean relative errors have been calculated using the formula below.

$$\% \text{ mean relative error} = \frac{100}{n} \sum_{i=1}^n \left| \frac{e_i - m_i}{m_i} \right|$$

**Formula S1.** Percent mean relative error. (the estimated value denoted by  $e$ , was compared with the measured value, which is denoted by  $m$  and number of observations are denoted by  $n$ .)

Percent mean errors of the benchmark study is given in Table S1. The combination of wb97xd functional with 6-31+G\* where MWB basis set was used for Ag, is found to have lowest % error among the full set. Although the chosen methodology is not significantly successful than the

other methods, we employed it because it is also highlighted in the literature for transition metals and dispersion corrections.

|               |          | Lanl2dz     | SDD         | MWB         |
|---------------|----------|-------------|-------------|-------------|
| <b>b3lyp</b>  | 6-31+G*  | 1.51 (1.73) | 1.41 (1.44) | 1.41 (1.44) |
|               | 6-311+G* | 1.52 (1.53) | 1.33 (1.70) | 1.33 (1.70) |
| <b>bpw91</b>  | 6-31+G*  | 1.31 (1.89) | 1.25 (1.77) | 1.25 (1.77) |
|               | 6-311+G* | 1.35 (1.78) | 1.16 (1.79) | 1.16 (1.79) |
| <b>M06L</b>   | 6-31+G*  | 1.78 (1.40) | 1.24 (0.98) | 0.87 (0.91) |
|               | 6-311+G* | 1.64 (1.25) | 1.20 (0.74) | 1.20 (0.74) |
| <b>wb97xd</b> | 6-31+G*  | 0.80 (1.01) | 0.53 (0.87) | 0.43 (0.94) |
|               | 6-311+G* | 0.71 (1.13) | 0.53 (0.94) | 0.53 (0.94) |

**Table S1.** Critical bond length deviations in Complex\_1 and Complex\_2 (in parenthesis) structures.

### Uncatalyzed Reaction

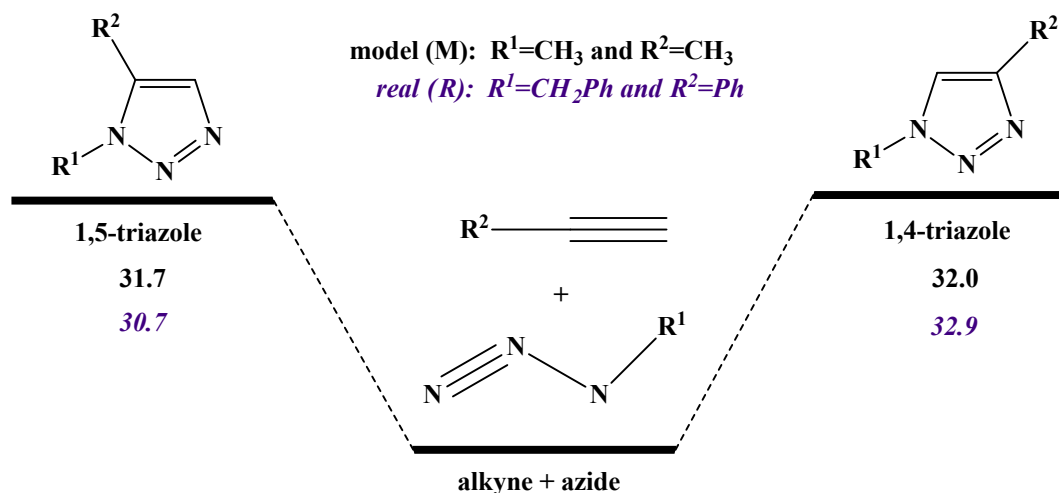

**Figure S2.** Uncatalyzed reaction barriers for model and real systems (with respect to azide-alkyne complex, kcal/mol)

---

---

## CARTESIAN COORDINATES OF THE STRUCTURES

---

---

### Ag<sub>1</sub>\_A\_M

|    |             |             |             |
|----|-------------|-------------|-------------|
| C  | 1.67511600  | -0.00533600 | 0.00120500  |
| C  | 2.89819300  | -0.00160000 | 0.00138200  |
| Ag | -0.35209600 | -0.00228600 | -0.00069800 |
| P  | -2.73914300 | 0.00446200  | 0.00072600  |
| H  | -3.42414400 | -0.71678300 | -0.99289400 |
| H  | -3.41815100 | -0.49516200 | 1.12561100  |
| H  | -3.41702900 | 1.22960800  | -0.12585400 |
| C  | 4.36287600  | 0.00621600  | 0.00014800  |
| H  | 4.75372600  | 0.66502400  | -0.78447000 |
| H  | 4.75836800  | 0.36039900  | 0.95961900  |
| H  | 4.76577200  | -0.99823200 | -0.17650000 |

|                                              |             |
|----------------------------------------------|-------------|
| Zero-point correction=                       | 0.074808    |
| (Hartree/Particle)                           |             |
| Thermal correction to Energy=                | 0.083735    |
| Thermal correction to Enthalpy=              | 0.084679    |
| Thermal correction to Gibbs Free Energy=     | 0.039435    |
| Sum of electronic and zero-point Energies=   | -606.081919 |
| Sum of electronic and thermal Energies=      | -606.072993 |
| Sum of electronic and thermal Enthalpies=    | -606.072048 |
| Sum of electronic and thermal Free Energies= | -606.117293 |

### Ag<sub>1</sub>\_TS<sub>AD</sub>\_M

|    |             |             |             |
|----|-------------|-------------|-------------|
| C  | -1.22811400 | -1.22537900 | -0.00361800 |
| C  | -2.45411500 | -0.92521500 | 0.00292300  |
| N  | -2.64467600 | 0.89292900  | -0.00221900 |
| N  | -1.71657100 | 1.63863600  | -0.00604000 |
| N  | -0.44191600 | 1.57246500  | -0.01910200 |
| C  | 0.21179200  | 2.88058900  | 0.01407100  |
| H  | 1.28145000  | 2.71275400  | -0.13463800 |
| H  | -0.14882900 | 3.54053300  | -0.78403600 |
| Ag | 0.67738900  | -0.48002300 | -0.00508200 |
| P  | 3.06605000  | -0.41335600 | 0.00721800  |
| H  | 3.77601500  | -1.11528300 | -0.98351100 |
| H  | 3.75016900  | 0.81311900  | -0.09804700 |
| H  | 3.74486900  | -0.91711300 | 1.13117000  |
| C  | -3.86313800 | -1.38166700 | 0.01364100  |
| H  | -4.38850700 | -1.00730700 | -0.87097300 |
| H  | -3.91181400 | -2.47356200 | 0.02291000  |
| H  | -4.37932000 | -0.99270900 | 0.89734500  |

H 0.07155000 3.38281900 0.97981400

|                                              |             |
|----------------------------------------------|-------------|
| Zero-point correction=                       | 0.126878    |
| (Hartree/Particle)                           |             |
| Thermal correction to Energy=                | 0.140211    |
| Thermal correction to Enthalpy=              | 0.141156    |
| Thermal correction to Gibbs Free Energy=     | 0.084956    |
| Sum of electronic and zero-point Energies=   | -810.030085 |
| Sum of electronic and thermal Energies=      | -810.016752 |
| Sum of electronic and thermal Enthalpies=    | -810.015807 |
| Sum of electronic and thermal Free Energies= | -810.072007 |

### Ag<sub>1</sub>D<sub>1</sub>M

|    |             |             |             |
|----|-------------|-------------|-------------|
| C  | 1.11010200  | 0.02415100  | 0.00173300  |
| C  | 2.01384100  | 1.08060700  | -0.00099200 |
| N  | 3.28722200  | 0.59671400  | -0.00505000 |
| N  | 3.24306200  | -0.70143500 | -0.00571100 |
| N  | 1.94658000  | -1.05411600 | -0.00143500 |
| C  | 1.60726300  | -2.45885300 | -0.00074700 |
| H  | 1.02751800  | -2.71259300 | -0.89361300 |
| H  | 2.54128700  | -3.02337500 | -0.00062100 |
| Ag | -0.96386000 | 0.00126300  | 0.00538400  |
| P  | -3.36478600 | 0.02564000  | -0.00731800 |
| H  | -4.02476500 | 1.00405700  | -0.77070200 |
| H  | -4.04790300 | -1.10753100 | -0.48126800 |
| H  | -4.05575700 | 0.19888500  | 1.20438900  |
| C  | 1.75363700  | 2.55400500  | -0.00103500 |
| H  | 2.17060500  | 3.02967800  | -0.89580900 |
| H  | 0.67699400  | 2.75533700  | 0.02260900  |
| H  | 2.21032100  | 3.03552200  | 0.87079800  |
| H  | 1.02779500  | -2.71156300 | 0.89255900  |

|                                              |                             |
|----------------------------------------------|-----------------------------|
| Zero-point correction=                       | 0.133195 (Hartree/Particle) |
| Thermal correction to Energy=                | 0.145438                    |
| Thermal correction to Enthalpy=              | 0.146382                    |
| Thermal correction to Gibbs Free Energy=     | 0.091523                    |
| Sum of electronic and zero-point Energies=   | -810.161859                 |
| Sum of electronic and thermal Energies=      | -810.149616                 |
| Sum of electronic and thermal Enthalpies=    | -810.148672                 |
| Sum of electronic and thermal Free Energies= | -810.203531                 |

### Ag<sub>1</sub>A<sub>1</sub>R

|    |             |             |             |
|----|-------------|-------------|-------------|
| C  | -0.00326400 | -0.01993000 | -0.00212800 |
| C  | -1.22787000 | -0.01478800 | -0.00164600 |
| Ag | 2.02764400  | -0.01019000 | -0.00093000 |
| P  | 4.41556000  | 0.02147600  | 0.00239600  |

|   |             |             |             |
|---|-------------|-------------|-------------|
| C | -2.66176400 | -0.00511500 | -0.00073200 |
| C | -3.38798300 | -1.20731600 | -0.00011900 |
| C | -3.36924200 | 1.20823000  | -0.00023200 |
| C | -4.77955400 | -1.19362700 | 0.00111400  |
| H | -2.84703200 | -2.14890700 | -0.00056400 |
| C | -4.76076000 | 1.21651100  | 0.00098800  |
| H | -2.81356700 | 2.14122800  | -0.00076100 |
| C | -5.47211400 | 0.01688600  | 0.00170500  |
| H | -5.32575900 | -2.13320500 | 0.00164800  |
| H | -5.29224900 | 2.16445700  | 0.00141700  |
| H | -6.55867000 | 0.02545400  | 0.00277300  |
| H | 5.11118600  | -0.88452100 | -0.81620500 |
| H | 5.07235900  | 1.20265400  | -0.38321500 |
| H | 5.09638200  | -0.21548000 | 1.20897200  |

|                                              |                             |
|----------------------------------------------|-----------------------------|
| Zero-point correction=                       | 0.129146 (Hartree/Particle) |
| Thermal correction to Energy=                | 0.140829                    |
| Thermal correction to Enthalpy=              | 0.141773                    |
| Thermal correction to Gibbs Free Energy=     | 0.086879                    |
| Sum of electronic and zero-point Energies=   | -797.704743                 |
| Sum of electronic and thermal Energies=      | -797.693061                 |
| Sum of electronic and thermal Enthalpies=    | -797.692116                 |
| Sum of electronic and thermal Free Energies= | -797.747010                 |

### Ag<sub>1</sub>TS<sub>Ad</sub>\_R

|    |             |             |             |
|----|-------------|-------------|-------------|
| C  | 1.46951200  | 0.91291700  | -0.03358400 |
| C  | 2.42871500  | 0.08922700  | -0.04231700 |
| N  | 1.77398100  | -1.61274000 | -0.35366600 |
| N  | 0.61877700  | -1.81415800 | -0.54533800 |
| N  | -0.46836500 | -1.15026900 | -0.59286000 |
| C  | -1.65601600 | -1.93703000 | -0.93553000 |
| H  | -1.88294500 | -1.81990900 | -2.00393900 |
| H  | -1.46210800 | -3.00221100 | -0.75870800 |
| Ag | -0.54512900 | 1.19413100  | -0.27281600 |
| P  | -2.75118300 | 2.11335200  | -0.43312900 |
| C  | 3.86988700  | -0.06731400 | 0.12276300  |
| C  | 4.55985800  | 0.82757100  | 0.95453500  |
| C  | 4.58853200  | -1.06827300 | -0.54062400 |
| C  | 5.93712900  | 0.72093900  | 1.11710200  |
| H  | 4.00301900  | 1.60197700  | 1.47355700  |
| C  | 5.96760500  | -1.17000500 | -0.37527000 |
| H  | 4.06247900  | -1.76469800 | -1.18368200 |
| C  | 6.64721300  | -0.27932800 | 0.45307200  |
| H  | 6.45734600  | 1.41925200  | 1.76701600  |
| H  | 6.51274700  | -1.95100300 | -0.89840300 |
| H  | 7.72251700  | -0.36472000 | 0.58279200  |
| C  | -2.85171300 | -1.49755900 | -0.11822600 |

|   |             |             |             |
|---|-------------|-------------|-------------|
| C | -4.09813000 | -1.31414000 | -0.72059000 |
| C | -2.73258400 | -1.28984300 | 1.26058500  |
| C | -5.21061700 | -0.94357500 | 0.03691600  |
| H | -4.20389600 | -1.46750100 | -1.79265800 |
| C | -3.83811400 | -0.91429100 | 2.01856500  |
| H | -1.76207100 | -1.41389800 | 1.73358700  |
| C | -5.08272300 | -0.74101500 | 1.40925300  |
| H | -6.17416300 | -0.81006100 | -0.44715400 |
| H | -3.72928800 | -0.75817200 | 3.08822600  |
| H | -5.94610400 | -0.45204100 | 2.00206900  |
| H | -2.99381800 | 3.48874100  | -0.26068300 |
| H | -3.45936300 | 1.93239600  | -1.63450400 |
| H | -3.71759300 | 1.60789500  | 0.45492500  |

|                                              |              |
|----------------------------------------------|--------------|
| Zero-point correction=                       | 0.263869     |
| (Hartree/Particle)                           |              |
| Thermal correction to Energy=                | 0.283886     |
| Thermal correction to Enthalpy=              | 0.284831     |
| Thermal correction to Gibbs Free Energy=     | 0.211976     |
| Sum of electronic and zero-point Energies=   | -1232.553352 |
| Sum of electronic and thermal Energies=      | -1232.533335 |
| Sum of electronic and thermal Enthalpies=    | -1232.532390 |
| Sum of electronic and thermal Free Energies= | -1232.605245 |

### Ag<sub>1</sub>D<sub>2</sub>R

|    |             |             |             |
|----|-------------|-------------|-------------|
| C  | -0.59125000 | 0.82272200  | -0.37935000 |
| C  | -1.91216500 | 1.17169500  | -0.10928500 |
| N  | -2.03537600 | 2.53375300  | -0.08722200 |
| N  | -0.87990400 | 3.06565000  | -0.31897200 |
| N  | -0.00826400 | 2.05010400  | -0.49136500 |
| C  | 1.36310600  | 2.37282100  | -0.84309300 |
| H  | 1.51175700  | 2.20729500  | -1.91625200 |
| H  | 1.47629300  | 3.44436500  | -0.65244300 |
| Ag | 0.52724700  | -0.94014600 | -0.43253600 |
| P  | 2.00215800  | -2.82303000 | -0.36643200 |
| C  | -3.08763100 | 0.31680500  | 0.12912700  |
| C  | -2.96376700 | -1.02764700 | 0.50112300  |
| C  | -4.37710600 | 0.84901300  | -0.01095800 |
| C  | -4.08832600 | -1.82197600 | 0.71001400  |
| H  | -1.97431700 | -1.45487600 | 0.64616200  |
| C  | -5.50168700 | 0.05796400  | 0.20492000  |
| H  | -4.48489600 | 1.89266300  | -0.28914700 |
| C  | -5.36523600 | -1.28325000 | 0.56201100  |
| H  | -3.96552800 | -2.86292300 | 0.99870000  |
| H  | -6.49127800 | 0.49245700  | 0.08958100  |
| H  | -6.24427500 | -1.89975900 | 0.72889300  |
| C  | 2.37812500  | 1.57412500  | -0.05461300 |
| C  | 3.44260900  | 0.94535400  | -0.70365700 |



|   |            |             |             |
|---|------------|-------------|-------------|
| C | 2.26320800 | 1.44810600  | 1.33422900  |
| C | 4.37792200 | 0.20015200  | 0.01745900  |
| H | 3.54127900 | 1.03610600  | -1.78322600 |
| C | 3.18827700 | 0.69906100  | 2.05454000  |
| H | 1.42676500 | 1.92028000  | 1.84299000  |
| C | 4.24934900 | 0.07102800  | 1.39834100  |
| H | 5.20743800 | -0.27390200 | -0.50103300 |
| H | 3.08241700 | 0.60480400  | 3.13156300  |
| H | 4.97524800 | -0.50666200 | 1.96430000  |
| H | 2.84408400 | -3.04873100 | -1.46882800 |
| H | 2.97488700 | -2.80883900 | 0.64676800  |
| H | 1.51937700 | -4.13235500 | -0.19430200 |

|                                              |                             |
|----------------------------------------------|-----------------------------|
| Zero-point correction=                       | 0.270195 (Hartree/Particle) |
| Thermal correction to Energy=                | 0.289136                    |
| Thermal correction to Enthalpy=              | 0.290081                    |
| Thermal correction to Gibbs Free Energy=     | 0.219192                    |
| Sum of electronic and zero-point Energies=   | -1232.687491                |
| Sum of electronic and thermal Energies=      | -1232.668549                |
| Sum of electronic and thermal Enthalpies=    | -1232.667605                |
| Sum of electronic and thermal Free Energies= | -1232.738494                |

### Methyl azide

|   |             |             |             |
|---|-------------|-------------|-------------|
| C | -1.53252400 | -0.28958400 | -0.00000300 |
| H | -1.53386800 | -0.92464500 | -0.89401200 |
| H | -2.43312100 | 0.32368000  | -0.00105700 |
| N | -0.39537600 | 0.63965800  | 0.00000000  |
| N | 0.71227700  | 0.10306000  | -0.00001700 |
| N | 1.78268300  | -0.27678200 | 0.00001300  |
| H | -1.53495900 | -0.92308300 | 0.89511800  |

|                                              |             |
|----------------------------------------------|-------------|
| Zero-point correction=                       | 0.051094    |
| (Hartree/Particle)                           |             |
| Thermal correction to Energy=                | 0.055514    |
| Thermal correction to Enthalpy=              | 0.056458    |
| Thermal correction to Gibbs Free Energy=     | 0.024616    |
| Sum of electronic and zero-point Energies=   | -203.972257 |
| Sum of electronic and thermal Energies=      | -203.967838 |
| Sum of electronic and thermal Enthalpies=    | -203.966894 |
| Sum of electronic and thermal Free Energies= | -203.998736 |

### Benzyl azide

|   |             |            |             |
|---|-------------|------------|-------------|
| H | -3.61865000 | 0.80872000 | -0.75751300 |
|---|-------------|------------|-------------|

|   |             |             |             |
|---|-------------|-------------|-------------|
| C | -2.65476800 | 0.45674100  | -0.40110700 |
| C | -1.89751500 | 1.24718500  | 0.45883300  |
| C | -2.17141400 | -0.78779900 | -0.80641700 |
| C | -0.66037000 | 0.79328200  | 0.91470600  |
| H | -2.26816800 | 2.21744700  | 0.77672900  |
| C | -0.93679000 | -1.23795000 | -0.35006300 |
| H | -2.75991600 | -1.40838100 | -1.47608600 |
| C | -0.17080700 | -0.45181100 | 0.51629100  |
| H | -0.07164400 | 1.41417600  | 1.58656400  |
| H | -0.55665600 | -2.20480500 | -0.67168800 |
| C | 1.18822600  | -0.92479300 | 0.97331800  |
| H | 1.49450100  | -0.39602200 | 1.88515500  |
| H | 1.17879500  | -1.99335400 | 1.19394200  |
| N | 2.23882600  | -0.77379600 | -0.06325200 |
| N | 2.37917200  | 0.37733000  | -0.48055200 |
| N | 2.58519600  | 1.39547900  | -0.93769100 |

|                                              |             |
|----------------------------------------------|-------------|
| Zero-point correction=                       | 0.134152    |
| (Hartree/Particle)                           |             |
| Thermal correction to Energy=                | 0.142477    |
| Thermal correction to Enthalpy=              | 0.143421    |
| Thermal correction to Gibbs Free Energy=     | 0.099247    |
| Sum of electronic and zero-point Energies=   | -434.870079 |
| Sum of electronic and thermal Energies=      | -434.861755 |
| Sum of electronic and thermal Enthalpies=    | -434.860810 |
| Sum of electronic and thermal Free Energies= | -434.904984 |

### $\mu^2$ - $\eta_1$ - $\eta_2$ coordination of the silver (I) acetylide (lamellar structure)

|    |             |             |             |
|----|-------------|-------------|-------------|
| Ag | -0.95056600 | 1.36285500  | -0.12793100 |
| P  | -3.17981400 | 2.28338400  | -0.33607400 |
| C  | 1.13828000  | 1.35686400  | -0.01673400 |
| C  | 2.35992200  | 1.23622200  | 0.07043800  |
| C  | 3.77999700  | 1.07343800  | 0.18029200  |
| C  | 4.38791600  | 0.92315900  | 1.43850200  |
| C  | 4.58582200  | 0.99988600  | -0.96873700 |
| C  | 5.75595000  | 0.68980900  | 1.54057900  |
| H  | 3.77024000  | 0.98236300  | 2.32985000  |
| C  | 5.95405600  | 0.76636000  | -0.86110000 |
| H  | 4.12227300  | 1.12468200  | -1.94322600 |
| C  | 6.54447600  | 0.60475500  | 0.39209900  |
| H  | 6.21009700  | 0.57337900  | 2.52089200  |
| H  | 6.56212200  | 0.71212700  | -1.76022100 |
| H  | 7.61202200  | 0.42186700  | 0.47502600  |
| Ag | 0.95080600  | -1.36097900 | -0.12801500 |
| P  | 3.17977800  | -2.28304800 | -0.33489500 |
| C  | -1.13809900 | -1.35574600 | -0.01731700 |
| C  | -2.35977700 | -1.23558700 | 0.07000700  |

|   |             |             |             |
|---|-------------|-------------|-------------|
| C | -3.77995800 | -1.07390300 | 0.18025400  |
| C | -4.38739100 | -0.92230000 | 1.43854800  |
| C | -4.58658000 | -1.00346000 | -0.96841100 |
| C | -5.75573100 | -0.69094000 | 1.54104800  |
| H | -3.76909900 | -0.97900900 | 2.32964100  |
| C | -5.95511700 | -0.77195400 | -0.86035800 |
| H | -4.12337800 | -1.12904000 | -1.94296600 |
| C | -6.54508500 | -0.60922000 | 0.39290900  |
| H | -6.20947300 | -0.57353200 | 2.52143400  |
| H | -6.56380900 | -0.72025100 | -1.75920900 |
| H | -7.61289000 | -0.42800800 | 0.47615600  |
| H | -4.18908300 | 1.86536200  | 0.54972900  |
| H | -3.37863400 | 3.67361200  | -0.24358200 |
| H | -3.86941400 | 2.06247500  | -1.54131700 |
| H | 4.19004400  | -1.86359900 | 0.54914700  |
| H | 3.37706600  | -3.67321400 | -0.23832100 |
| H | 3.86908800  | -2.06674800 | -1.54114400 |

|                                              |                             |
|----------------------------------------------|-----------------------------|
| Zero-point correction=                       | 0.258996 (Hartree/Particle) |
| Thermal correction to Energy=                | 0.283959                    |
| Thermal correction to Enthalpy=              | 0.284903                    |
| Thermal correction to Gibbs Free Energy=     | 0.197686                    |
| Sum of electronic and zero-point Energies=   | -1595.448195                |
| Sum of electronic and thermal Energies=      | -1595.423233                |
| Sum of electronic and thermal Enthalpies=    | -1595.422288                |
| Sum of electronic and thermal Free Energies= | -1595.509506                |

## Ag<sub>2</sub>\_A\_M

|    |             |             |             |
|----|-------------|-------------|-------------|
| C  | 1.02672600  | -1.46589300 | -0.00464600 |
| C  | 1.90574500  | -2.32514600 | 0.00725400  |
| C  | 2.89924900  | -3.39584500 | 0.02145900  |
| H  | 2.40833300  | -4.36037100 | -0.14919400 |
| H  | 3.64517100  | -3.25566200 | -0.76807100 |
| H  | 3.41737500  | -3.44670000 | 0.98480200  |
| C  | -2.91698500 | -0.15107400 | -0.00434400 |
| C  | -4.05838800 | 0.29169000  | 0.00579500  |
| C  | -5.43052600 | 0.80677100  | 0.02081700  |
| H  | -5.66559300 | 1.28509700  | 0.97944600  |
| H  | -5.58648100 | 1.55200200  | -0.76886000 |
| H  | -6.15930800 | 0.00218700  | -0.13498700 |
| Ag | -1.00730600 | -0.85785200 | -0.00976700 |
| Ag | 1.37433300  | 0.63418000  | -0.00043100 |
| P  | 1.66677400  | 3.00944300  | 0.00306900  |
| H  | 2.94312100  | 3.59679700  | 0.00271400  |
| H  | 1.09635600  | 3.71565600  | 1.07411800  |
| H  | 1.09422900  | 3.71888700  | -1.06469700 |

|                                              |             |
|----------------------------------------------|-------------|
| Zero-point correction=                       | 0.123268    |
| (Hartree/Particle)                           |             |
| Thermal correction to Energy=                | 0.139035    |
| Thermal correction to Enthalpy=              | 0.139979    |
| Thermal correction to Gibbs Free Energy=     | 0.074429    |
| Sum of electronic and zero-point Energies=   | -869.088733 |
| Sum of electronic and thermal Energies=      | -869.072966 |
| Sum of electronic and thermal Enthalpies=    | -869.072021 |
| Sum of electronic and thermal Free Energies= | -869.137572 |

### Ag<sub>2</sub>\_TS<sub>AC</sub>\_M\_1

|    |             |             |             |
|----|-------------|-------------|-------------|
| C  | -0.85980700 | 1.29697100  | -0.00033800 |
| C  | -1.81587900 | 2.12252400  | 0.00416500  |
| C  | -2.16745900 | 3.56525400  | 0.01266600  |
| H  | -1.26011600 | 4.17359000  | 0.01451300  |
| H  | -2.76584200 | 3.81236300  | -0.86964200 |
| H  | -2.76270200 | 3.80254400  | 0.89978700  |
| C  | 3.23861400  | 0.52832300  | -0.00156400 |
| C  | 4.41516100  | 0.18825700  | 0.00038600  |
| C  | 5.83511100  | -0.17572900 | 0.00278600  |
| H  | 6.09713900  | -0.76129100 | 0.89228000  |
| H  | 6.09758000  | -0.77210900 | -0.87936900 |
| H  | 6.46896000  | 0.71901400  | -0.00248500 |
| N  | -3.46686400 | 1.37604600  | -0.00098100 |
| N  | -3.63314500 | 0.20308000  | -0.00549300 |
| N  | -2.96385900 | -0.87664400 | -0.01923600 |
| C  | -3.76614800 | -2.10239200 | 0.01004300  |
| H  | -4.50990600 | -2.11350600 | -0.79356900 |
| H  | -3.08146500 | -2.93985800 | -0.13475900 |
| H  | -4.27250600 | -2.22609700 | 0.97412900  |
| Ag | 1.25583000  | 1.01869800  | -0.00266500 |
| Ag | -0.75537800 | -0.85070400 | -0.00154000 |
| P  | 0.89308400  | -2.65419700 | 0.00555300  |
| H  | 0.62983700  | -4.03872400 | 0.00727400  |
| H  | 1.80181500  | -2.59579600 | 1.07359500  |
| H  | 1.80922200  | -2.59954300 | -1.05629400 |

|                                              |                             |
|----------------------------------------------|-----------------------------|
| Zero-point correction=                       | 0.175127 (Hartree/Particle) |
| Thermal correction to Energy=                | 0.195476                    |
| Thermal correction to Enthalpy=              | 0.196420                    |
| Thermal correction to Gibbs Free Energy=     | 0.120244                    |
| Sum of electronic and zero-point Energies=   | -1073.045097                |
| Sum of electronic and thermal Energies=      | -1073.024749                |
| Sum of electronic and thermal Enthalpies=    | -1073.023804                |
| Sum of electronic and thermal Free Energies= | -1073.099980                |

### Ag<sub>2</sub>\_TS<sub>AC</sub>\_M\_2

|    |             |             |             |
|----|-------------|-------------|-------------|
| C  | 1.23438200  | -1.08904900 | 0.00383700  |
| C  | 2.40135600  | -1.57410300 | 0.01081900  |
| C  | 3.19645700  | -2.82916900 | 0.02222300  |
| H  | 2.53562500  | -3.69961100 | 0.02123400  |
| H  | 3.84814900  | -2.87047500 | -0.85610400 |
| H  | 3.83457700  | -2.86271600 | 0.91086700  |
| C  | -1.45954400 | 1.85946600  | 0.00094400  |
| C  | -2.61860700 | 2.26310900  | 0.01165400  |
| C  | -3.97630400 | 2.81826800  | 0.02825600  |
| H  | -4.19321800 | 3.30734000  | 0.98540900  |
| H  | -4.10915700 | 3.56520600  | -0.76339700 |
| H  | -4.73965000 | 2.04279300  | -0.12390300 |
| N  | 3.73479000  | -0.35112400 | 0.00627600  |
| N  | 3.48696800  | 0.80785000  | -0.00131500 |
| N  | 2.49527900  | 1.58929600  | -0.00833000 |
| C  | 2.79948400  | 3.02262500  | -0.01590400 |
| H  | 3.36534700  | 3.30328800  | -0.91115200 |
| H  | 1.84485100  | 3.54979400  | -0.02089800 |
| H  | 3.36170000  | 3.31361800  | 0.87831900  |
| Ag | -0.87065000 | -1.49893700 | -0.00262500 |
| Ag | 0.39399100  | 0.90569100  | -0.00238300 |
| P  | -3.27170000 | -1.29708100 | -0.01250200 |
| H  | -3.78825700 | -0.56495100 | 1.06628500  |
| H  | -4.19207700 | -2.36246900 | -0.03511200 |
| H  | -3.77200000 | -0.53206200 | -1.07605100 |

|                                              |              |
|----------------------------------------------|--------------|
| Zero-point correction=                       | 0.175562     |
| (Hartree/Particle)                           |              |
| Thermal correction to Energy=                | 0.195734     |
| Thermal correction to Enthalpy=              | 0.196678     |
| Thermal correction to Gibbs Free Energy=     | 0.121268     |
| Sum of electronic and zero-point Energies=   | -1073.037508 |
| Sum of electronic and thermal Energies=      | -1073.017336 |
| Sum of electronic and thermal Enthalpies=    | -1073.016392 |
| Sum of electronic and thermal Free Energies= | -1073.091802 |

### Ag<sub>2</sub>\_TS<sub>AD</sub>\_M\_3

|   |            |            |             |
|---|------------|------------|-------------|
| C | 0.95378600 | 1.52948100 | -0.00477700 |
| C | 1.52290800 | 2.61928600 | 0.00086000  |
| C | 2.12359100 | 3.95294100 | 0.00784700  |
| H | 3.19685900 | 3.89971000 | -0.20395400 |

|    |             |             |             |
|----|-------------|-------------|-------------|
| H  | 1.66333800  | 4.58936500  | -0.75589000 |
| H  | 1.99470600  | 4.43765100  | 0.98158100  |
| C  | -1.88076500 | -1.49427400 | -0.00717900 |
| C  | -3.08386700 | -1.87822000 | -0.00035300 |
| C  | -4.03439100 | -3.01516300 | 0.00624900  |
| H  | -4.66293100 | -2.97890600 | 0.90232100  |
| H  | -4.69648600 | -2.96190700 | -0.86428800 |
| H  | -3.49675800 | -3.96691000 | -0.01275000 |
| N  | -4.20651000 | -0.44488400 | 0.00744900  |
| N  | -3.79686200 | 0.67543300  | 0.00747800  |
| N  | -2.66860500 | 1.26552300  | 0.00322500  |
| C  | -2.74716400 | 2.72461700  | 0.00598800  |
| H  | -3.26160400 | 3.10372300  | 0.89792600  |
| H  | -1.72018000 | 3.09691800  | 0.01025300  |
| H  | -3.25557700 | 3.10735200  | -0.88791800 |
| Ag | 2.09461700  | -0.28184100 | 0.00002800  |
| Ag | -0.64549700 | 0.12206800  | -0.00786000 |
| P  | 3.47934800  | -2.23430400 | 0.00599900  |
| H  | 3.49148100  | -3.01408300 | 1.17440800  |
| H  | 4.86497100  | -2.15634100 | -0.21776100 |
| H  | 3.16255300  | -3.23718400 | -0.92467600 |

|                                              |                             |
|----------------------------------------------|-----------------------------|
| Zero-point correction=                       | 0.174752 (Hartree/Particle) |
| Thermal correction to Energy=                | 0.195316                    |
| Thermal correction to Enthalpy=              | 0.196260                    |
| Thermal correction to Gibbs Free Energy=     | 0.118387                    |
| Sum of electronic and zero-point Energies=   | -1073.038287                |
| Sum of electronic and thermal Energies=      | -1073.017722                |
| Sum of electronic and thermal Enthalpies=    | -1073.016778                |
| Sum of electronic and thermal Free Energies= | -1073.094652                |

### Ag<sub>2</sub>C<sub>2</sub>M

|   |             |             |             |
|---|-------------|-------------|-------------|
| C | 0.88359900  | 1.20134800  | 0.01528700  |
| C | 1.91924000  | 1.99767400  | 0.00715700  |
| C | 1.79438800  | 3.50099500  | 0.03663000  |
| H | 0.75266500  | 3.82862500  | 0.07029100  |
| H | 2.32188900  | 3.88155600  | 0.91676600  |
| H | 2.27486100  | 3.91321300  | -0.85606400 |
| C | -3.20423500 | 0.52920900  | -0.01085800 |
| C | -4.39267800 | 0.23484400  | -0.02635000 |
| C | -5.82341500 | -0.08105200 | -0.04625400 |
| H | -5.99464700 | -1.15093400 | -0.21470800 |
| H | -6.30195500 | 0.18684300  | 0.90286500  |
| H | -6.33648800 | 0.46624600  | -0.84568700 |
| N | 3.31535100  | 1.60663600  | -0.03050600 |
| N | 3.66504000  | 0.40748400  | -0.04702800 |
| N | 2.90927500  | -0.63059500 | -0.05071100 |
| C | 3.64776600  | -1.89783700 | -0.03319400 |

|    |             |             |             |
|----|-------------|-------------|-------------|
| H  | 3.50309800  | -2.40666700 | 0.92661400  |
| H  | 3.28297100  | -2.54810100 | -0.83488000 |
| H  | 4.71457300  | -1.71123400 | -0.18106700 |
| Ag | 0.76325900  | -0.88485800 | 0.01299400  |
| Ag | -1.21818500 | 0.98653000  | 0.00518700  |
| P  | -0.75419100 | -2.80209600 | 0.02685200  |
| H  | -1.59695500 | -2.87917900 | 1.14656100  |
| H  | -1.73026300 | -2.76985700 | -0.98064400 |
| H  | -0.37101400 | -4.15345800 | -0.06410100 |

|                                              |              |
|----------------------------------------------|--------------|
| Zero-point correction=                       | 0.176801     |
| (Hartree/Particle)                           |              |
| Thermal correction to Energy=                | 0.196996     |
| Thermal correction to Enthalpy=              | 0.197940     |
| Thermal correction to Gibbs Free Energy=     | 0.121619     |
| Sum of electronic and zero-point Energies=   | -1073.051265 |
| Sum of electronic and thermal Energies=      | -1073.031070 |
| Sum of electronic and thermal Enthalpies=    | -1073.030126 |
| Sum of electronic and thermal Free Energies= | -1073.106447 |

## Ag<sub>2</sub>\_TS<sub>CD</sub>\_M

|    |             |             |             |
|----|-------------|-------------|-------------|
| C  | 0.86188100  | -1.18024400 | -0.09892400 |
| C  | 1.86107000  | -2.02210100 | -0.21521200 |
| C  | 1.63609800  | -3.46282700 | -0.60767200 |
| H  | 0.58065200  | -3.68575500 | -0.78010200 |
| H  | 2.20357800  | -3.67196600 | -1.51956400 |
| H  | 2.01666800  | -4.10797600 | 0.19018100  |
| C  | -3.21600900 | -0.52975600 | 0.20991800  |
| C  | -4.41154200 | -0.27247600 | 0.26860200  |
| C  | -5.84787900 | 0.00684800  | 0.34498000  |
| H  | -6.03876100 | 1.07564400  | 0.49873300  |
| H  | -6.35967200 | -0.29327900 | -0.57687300 |
| H  | -6.31219500 | -0.53543000 | 1.17692000  |
| N  | 3.24844900  | -1.74918100 | 0.01651000  |
| N  | 3.60511800  | -0.59023200 | 0.34669900  |
| N  | 2.82337700  | 0.41587700  | 0.50112300  |
| C  | 3.51872200  | 1.63655200  | 0.92645600  |
| H  | 3.51183700  | 2.38387600  | 0.12417700  |
| H  | 3.01375700  | 2.05527700  | 1.80272300  |
| H  | 4.55488200  | 1.40426500  | 1.18654100  |
| Ag | 0.78484900  | 0.91938200  | -0.19392000 |
| Ag | -1.22506800 | -0.93710100 | 0.08957400  |
| P  | -0.52051600 | 2.94871300  | -0.44580200 |
| H  | -1.23782700 | 3.08183500  | -1.64530300 |
| H  | -1.58477900 | 3.05117400  | 0.46371000  |
| H  | -0.00279700 | 4.25323100  | -0.34904400 |

|                                              |                             |
|----------------------------------------------|-----------------------------|
| Zero-point correction=                       | 0.176987 (Hartree/Particle) |
| Thermal correction to Energy=                | 0.196164                    |
| Thermal correction to Enthalpy=              | 0.197109                    |
| Thermal correction to Gibbs Free Energy=     | 0.124820                    |
| Sum of electronic and zero-point Energies=   | -1073.050531                |
| Sum of electronic and thermal Energies=      | -1073.031353                |
| Sum of electronic and thermal Enthalpies=    | -1073.030409                |
| Sum of electronic and thermal Free Energies= | -1073.102697                |

## Ag<sub>2</sub>\_D\_M

|    |             |             |             |
|----|-------------|-------------|-------------|
| C  | -1.13132900 | -0.90730800 | 0.01510100  |
| C  | -1.82596600 | -1.46330900 | 1.09760000  |
| C  | -1.64271500 | -1.22040700 | 2.56124000  |
| H  | -0.84191200 | -0.49599900 | 2.73963600  |
| H  | -2.56643200 | -0.84418000 | 3.01332000  |
| H  | -1.37987000 | -2.15119700 | 3.07366600  |
| C  | 3.07863500  | -0.57246800 | 0.02633200  |
| C  | 4.29558300  | -0.44136200 | 0.02595400  |
| C  | 5.75469800  | -0.30506100 | 0.02579300  |
| H  | 6.06291400  | 0.69315000  | -0.30808400 |
| H  | 6.16971200  | -0.46302500 | 1.02837000  |
| H  | 6.21989200  | -1.03716900 | -0.64503300 |
| N  | -2.75381100 | -2.34455300 | 0.64661900  |
| N  | -2.69393400 | -2.38071600 | -0.65597900 |
| N  | -1.74868800 | -1.53650400 | -1.04737600 |
| C  | -1.45955600 | -1.40598100 | -2.46289100 |
| H  | -1.65868200 | -0.38416500 | -2.79795000 |
| H  | -0.41319200 | -1.65310300 | -2.65678400 |
| H  | -2.11055500 | -2.09932600 | -2.99645100 |
| Ag | -0.85435200 | 1.24639600  | -0.02888600 |
| Ag | 1.05548500  | -0.76240600 | 0.02521000  |
| P  | -0.62562800 | 3.63520100  | -0.03457900 |
| H  | -0.06364400 | 4.22531400  | 1.10916000  |
| H  | 0.21542000  | 4.19137200  | -1.01181400 |
| H  | -1.74354300 | 4.47054000  | -0.19417700 |

|                                              |              |
|----------------------------------------------|--------------|
| Zero-point correction=                       | 0.181511     |
| (Hartree/Particle)                           |              |
| Thermal correction to Energy=                | 0.200647     |
| Thermal correction to Enthalpy=              | 0.201591     |
| Thermal correction to Gibbs Free Energy=     | 0.128849     |
| Sum of electronic and zero-point Energies=   | -1073.165585 |
| Sum of electronic and thermal Energies=      | -1073.146449 |
| Sum of electronic and thermal Enthalpies=    | -1073.145505 |
| Sum of electronic and thermal Free Energies= | -1073.218247 |



## Ag<sub>2</sub>\_A\_R

|    |             |             |             |
|----|-------------|-------------|-------------|
| C  | 1.74465500  | -0.25862800 | -0.04990400 |
| C  | 2.89186300  | -0.70479700 | -0.02750700 |
| C  | -2.38239500 | -0.73819900 | -0.08085900 |
| C  | -3.60557200 | -0.81529200 | -0.05369100 |
| Ag | -0.35065800 | -0.57498400 | -0.08200000 |
| Ag | 1.18054300  | 1.79244200  | 0.00164100  |
| P  | 0.47384100  | 4.08046600  | 0.07653900  |
| H  | 1.39908200  | 5.12959800  | -0.05427700 |
| H  | -0.18853600 | 4.50849500  | 1.23811800  |
| H  | -0.46727600 | 4.48497100  | -0.88327900 |
| C  | 4.21146500  | -1.25948000 | 0.00443300  |
| C  | 4.84003600  | -1.51837000 | 1.23264400  |
| C  | 4.88694500  | -1.55495500 | -1.19009400 |
| C  | 6.11997400  | -2.06122700 | 1.26232800  |
| H  | 4.31290300  | -1.29511800 | 2.15516700  |
| C  | 6.16646400  | -2.09873200 | -1.15304900 |
| H  | 4.39617200  | -1.36007400 | -2.13867100 |
| C  | 6.78499900  | -2.35186800 | 0.07116000  |
| H  | 6.59899000  | -2.26054900 | 2.21644400  |
| H  | 6.68135400  | -2.32778000 | -2.08150100 |
| H  | 7.78312900  | -2.77963000 | 0.09726900  |
| C  | -5.03445000 | -0.92018900 | -0.00596600 |
| C  | -5.80312400 | -0.87435600 | -1.18132600 |
| C  | -5.69904200 | -1.07584700 | 1.22235300  |
| C  | -7.18985300 | -0.98090800 | -1.12718400 |
| H  | -5.29730800 | -0.75711500 | -2.13515700 |
| C  | -7.08561800 | -1.18208200 | 1.27163700  |
| H  | -5.11152900 | -1.11534500 | 2.13490600  |
| C  | -7.83807600 | -1.13540000 | 0.09803300  |
| H  | -7.76707400 | -0.94585300 | -2.04763200 |
| H  | -7.58124800 | -1.30513200 | 2.23113700  |
| H  | -8.92051500 | -1.22200300 | 0.13823300  |

|                                              |              |
|----------------------------------------------|--------------|
| Zero-point correction=                       | 0.231699     |
| (Hartree/Particle)                           |              |
| Thermal correction to Energy=                | 0.253104     |
| Thermal correction to Enthalpy=              | 0.254048     |
| Thermal correction to Gibbs Free Energy=     | 0.171944     |
| Sum of electronic and zero-point Energies=   | -1252.334682 |
| Sum of electronic and thermal Energies=      | -1252.313277 |
| Sum of electronic and thermal Enthalpies=    | -1252.312333 |
| Sum of electronic and thermal Free Energies= | -1252.394437 |

## Ag<sub>2</sub>\_TS<sub>AC</sub>\_R

|   |             |             |             |
|---|-------------|-------------|-------------|
| C | -1.57633300 | -1.00224600 | -0.10145800 |
|---|-------------|-------------|-------------|

|    |             |             |             |
|----|-------------|-------------|-------------|
| C  | -2.75124900 | -1.45785100 | 0.00530300  |
| C  | 2.53889200  | -1.64396700 | -0.05519300 |
| C  | 3.76282500  | -1.57357400 | -0.02243900 |
| N  | -4.04488600 | -0.16053200 | 0.09000200  |
| N  | -3.77816400 | 0.98718700  | 0.00543900  |
| N  | -2.77742100 | 1.75885900  | -0.11540800 |
| C  | -3.09932800 | 3.19266900  | -0.23236000 |
| H  | -3.39543300 | 3.42398600  | -1.26302200 |
| H  | -3.94896700 | 3.42465200  | 0.42037600  |
| Ag | 0.50003500  | -1.48839800 | -0.08575500 |
| Ag | -0.71905300 | 0.95418800  | -0.35276000 |
| P  | 1.42158000  | 2.10204600  | -0.63113400 |
| H  | 1.54591700  | 3.48723600  | -0.84326400 |
| H  | 2.26331800  | 1.62560000  | -1.64924400 |
| H  | 2.29737900  | 1.95318300  | 0.45593100  |
| C  | -3.49276100 | -2.71334600 | 0.11893500  |
| C  | -2.87147600 | -3.79944900 | 0.75311700  |
| C  | -4.77686500 | -2.87393100 | -0.41048300 |
| C  | -3.52526900 | -5.02227300 | 0.85276300  |
| H  | -1.87792400 | -3.67261900 | 1.17275400  |
| C  | -5.42495500 | -4.10257400 | -0.31174000 |
| H  | -5.26320800 | -2.03741900 | -0.90007400 |
| C  | -4.80441000 | -5.17858300 | 0.31939500  |
| H  | -3.03432200 | -5.85492200 | 1.34831000  |
| H  | -6.41928100 | -4.21857000 | -0.73365700 |
| H  | -5.31396200 | -6.13477600 | 0.39661500  |
| C  | 5.19387300  | -1.50028300 | 0.03501200  |
| C  | 5.85204100  | -1.35927600 | 1.26834200  |
| C  | 5.96839600  | -1.56174200 | -1.13552000 |
| C  | 7.23986800  | -1.27708900 | 1.32668800  |
| H  | 5.25974200  | -1.31836600 | 2.17780000  |
| C  | 7.35633900  | -1.47890100 | -1.07211500 |
| H  | 5.46739100  | -1.67869000 | -2.09196600 |
| C  | 7.99843800  | -1.33493400 | 0.15755000  |
| H  | 7.73187200  | -1.16869700 | 2.28966900  |
| H  | 7.93939100  | -1.52927500 | -1.98799000 |
| H  | 9.08200200  | -1.27013400 | 0.20520500  |
| C  | -1.90439700 | 4.02901600  | 0.15707400  |
| C  | -1.38034400 | 4.97579200  | -0.72320700 |
| C  | -1.30748800 | 3.86722200  | 1.41261600  |
| C  | -0.28488900 | 5.75907000  | -0.35637400 |
| H  | -1.83234600 | 5.10641300  | -1.70375800 |
| C  | -0.20650500 | 4.63723500  | 1.77701800  |
| H  | -1.70491100 | 3.12698100  | 2.10306600  |
| C  | 0.30574100  | 5.58911400  | 0.89310200  |
| H  | 0.10701000  | 6.49739800  | -1.05030400 |
| H  | 0.24843200  | 4.50101900  | 2.75407100  |
| H  | 1.16048300  | 6.19500000  | 1.18031500  |

|                                              |                             |
|----------------------------------------------|-----------------------------|
| Zero-point correction=                       | 0.366159 (Hartree/Particle) |
| Thermal correction to Energy=                | 0.396192                    |
| Thermal correction to Enthalpy=              | 0.397136                    |
| Thermal correction to Gibbs Free Energy=     | 0.296750                    |
| Sum of electronic and zero-point Energies=   | -1687.190423                |
| Sum of electronic and thermal Energies=      | -1687.160390                |
| Sum of electronic and thermal Enthalpies=    | -1687.159446                |
| Sum of electronic and thermal Free Energies= | -1687.259832                |

## Ag<sub>2</sub>C<sub>2</sub>R

|    |             |             |             |
|----|-------------|-------------|-------------|
| C  | -2.08588400 | -0.78268500 | -0.10050100 |
| C  | -3.29287000 | -1.28939800 | -0.03563800 |
| C  | 1.99025200  | -1.54845200 | -0.03436600 |
| C  | 3.20568600  | -1.69977100 | 0.01298700  |
| N  | -4.53196100 | -0.53678300 | 0.00430900  |
| N  | -4.54084600 | 0.70957100  | -0.02858200 |
| N  | -3.52207100 | 1.49690700  | -0.05129900 |
| C  | -3.89070500 | 2.91615400  | -0.18173300 |
| H  | -3.78355700 | 3.22279300  | -1.23009200 |
| H  | -4.94890200 | 3.01723300  | 0.08230600  |
| Ag | -0.02499900 | -1.23768500 | -0.08286600 |
| Ag | -1.36434300 | 1.14721200  | -0.15123000 |
| P  | 0.36839900  | 2.86274600  | -0.15071300 |
| H  | 0.35032000  | 3.78234500  | 0.91145900  |
| H  | 0.48006200  | 3.76354200  | -1.22336600 |
| H  | 1.69983700  | 2.42071100  | -0.07692900 |
| C  | -3.52233600 | -2.75940700 | -0.05063700 |
| C  | -2.67750800 | -3.62908800 | 0.64811800  |
| C  | -4.58891200 | -3.27923300 | -0.78981200 |
| C  | -2.88803500 | -5.00434000 | 0.59308200  |
| H  | -1.87237200 | -3.22795700 | 1.25785100  |
| C  | -4.79757500 | -4.65432000 | -0.83851400 |
| H  | -5.24975400 | -2.60045200 | -1.31936700 |
| C  | -3.94628800 | -5.52013000 | -0.15218900 |
| H  | -2.22868800 | -5.67048300 | 1.14167500  |
| H  | -5.62763600 | -5.05129200 | -1.41594600 |
| H  | -4.11114200 | -6.59299800 | -0.19447200 |
| C  | 4.62616900  | -1.88484200 | 0.07520700  |
| C  | 5.27144200  | -2.05545600 | 1.31127500  |
| C  | 5.40177400  | -1.89999000 | -1.09597700 |
| C  | 6.64999800  | -2.23454000 | 1.37203700  |
| H  | 4.67678300  | -2.04820700 | 2.22002600  |
| C  | 6.78029000  | -2.07915900 | -1.03000700 |
| H  | 4.90845500  | -1.77240900 | -2.05496100 |
| C  | 7.41051000  | -2.24688900 | 0.20281800  |
| H  | 7.13299000  | -2.36740200 | 2.33646300  |
| H  | 7.36486600  | -2.09024400 | -1.94620600 |
| H  | 8.48653200  | -2.38901000 | 0.25264300  |

|   |             |            |             |
|---|-------------|------------|-------------|
| C | -3.04513400 | 3.81226100 | 0.69499100  |
| C | -2.51028300 | 4.99700800 | 0.18341100  |
| C | -2.79948100 | 3.48348700 | 2.03275400  |
| C | -1.75233800 | 5.84553000 | 0.99146400  |
| H | -2.69158000 | 5.26169200 | -0.85631100 |
| C | -2.03342900 | 4.32191600 | 2.83846900  |
| H | -3.20661000 | 2.56085100 | 2.43838500  |
| C | -1.50874200 | 5.50781500 | 2.32093500  |
| H | -1.34827700 | 6.76596000 | 0.57906000  |
| H | -1.85091300 | 4.05437700 | 3.87536000  |
| H | -0.91535300 | 6.16324300 | 2.95191700  |

|                                              |              |
|----------------------------------------------|--------------|
| Zero-point correction=                       | 0.368489     |
| (Hartree/Particle)                           |              |
| Thermal correction to Energy=                | 0.398033     |
| Thermal correction to Enthalpy=              | 0.398977     |
| Thermal correction to Gibbs Free Energy=     | 0.300094     |
| Sum of electronic and zero-point Energies=   | -1687.197469 |
| Sum of electronic and thermal Energies=      | -1687.167925 |
| Sum of electronic and thermal Enthalpies=    | -1687.166981 |
| Sum of electronic and thermal Free Energies= | -1687.265864 |

### Ag<sub>2</sub>TS<sub>CD</sub>\_R

|    |             |             |             |
|----|-------------|-------------|-------------|
| C  | -1.52444800 | 0.33442400  | -1.06015600 |
| C  | -2.55056600 | 1.29013400  | -1.09645300 |
| C  | 2.63497900  | 0.57785500  | -0.53238400 |
| C  | 3.84732300  | 0.58374600  | -0.35257900 |
| N  | -3.49526400 | 0.91888800  | -2.00510600 |
| N  | -3.13347200 | -0.20529300 | -2.54796400 |
| N  | -1.97491400 | -0.56561700 | -1.99979500 |
| C  | -1.35817800 | -1.82437000 | -2.40210000 |
| H  | -1.98485100 | -2.21575900 | -3.20726000 |
| H  | -0.36345200 | -1.61792900 | -2.80681300 |
| Ag | -1.26587800 | -0.53642300 | 0.95849900  |
| Ag | 0.61704300  | 0.52487800  | -0.78537300 |
| P  | -1.13530400 | -1.58707300 | 3.10661200  |
| C  | 5.26546000  | 0.60796300  | -0.14242600 |
| C  | 6.14507700  | 0.06976100  | -1.09650300 |
| C  | 5.80645100  | 1.17364000  | 1.02433300  |
| C  | 7.52071100  | 0.09750200  | -0.88785200 |
| H  | 5.73456300  | -0.36605500 | -2.00254900 |
| C  | 7.18250100  | 1.19886800  | 1.22872200  |
| H  | 5.13181900  | 1.59435800  | 1.76424300  |
| C  | 8.04636700  | 0.66109200  | 0.27472700  |

|   |             |             |             |
|---|-------------|-------------|-------------|
| H | 8.18701100  | -0.32055500 | -1.63806000 |
| H | 7.58353700  | 1.64303700  | 2.13602600  |
| H | 9.12081800  | 0.68382200  | 0.43475100  |
| C | -2.71175400 | 2.52377800  | -0.30448900 |
| C | -3.98675900 | 3.08166200  | -0.14644100 |
| C | -1.62011400 | 3.15383800  | 0.30584600  |
| C | -4.16438100 | 4.23478000  | 0.61229800  |
| H | -4.83427700 | 2.60298800  | -0.62719800 |
| C | -1.80033500 | 4.30353700  | 1.06952900  |
| H | -0.61691300 | 2.75833200  | 0.16828400  |
| C | -3.07350600 | 4.84831400  | 1.22733800  |
| H | -5.15927000 | 4.65727400  | 0.72318500  |
| H | -0.93943800 | 4.78120000  | 1.52861800  |
| H | -3.21294700 | 5.75109100  | 1.81533800  |
| C | -1.27466100 | -2.80097200 | -1.24893600 |
| C | -0.03961300 | -3.18417300 | -0.72167800 |
| C | -2.44961900 | -3.30077100 | -0.67444600 |
| C | 0.02336000  | -4.06244800 | 0.36187100  |
| H | 0.87732500  | -2.78280900 | -1.14657200 |
| C | -2.38818600 | -4.17488000 | 0.40725800  |
| H | -3.41231800 | -2.99615200 | -1.07917100 |
| C | -1.14950200 | -4.55987000 | 0.92632800  |
| H | 0.99077700  | -4.35526000 | 0.75984600  |
| H | -3.30538500 | -4.56677000 | 0.83825500  |
| H | -1.10131100 | -5.25646200 | 1.75931200  |
| H | -1.18655200 | -0.80653000 | 4.27400200  |
| H | -2.08306300 | -2.56624700 | 3.44423600  |
| H | 0.04059800  | -2.30921400 | 3.36465800  |

|                                              |              |
|----------------------------------------------|--------------|
| Zero-point correction=                       | 0.372500     |
| (Hartree/Particle)                           |              |
| Thermal correction to Energy=                | 0.401421     |
| Thermal correction to Enthalpy=              | 0.402366     |
| Thermal correction to Gibbs Free Energy=     | 0.304844     |
| Sum of electronic and zero-point Energies=   | -1687.321504 |
| Sum of electronic and thermal Energies=      | -1687.292582 |
| Sum of electronic and thermal Enthalpies=    | -1687.291638 |
| Sum of electronic and thermal Free Energies= | -1687.389159 |

### Ag<sub>2</sub>D<sub>2</sub>R

|   |             |             |             |
|---|-------------|-------------|-------------|
| C | -1.52444800 | 0.33442400  | -1.06015600 |
| C | -2.55056600 | 1.29013400  | -1.09645300 |
| C | 2.63497900  | 0.57785500  | -0.53238400 |
| C | 3.84732300  | 0.58374600  | -0.35257900 |
| N | -3.49526400 | 0.91888800  | -2.00510600 |
| N | -3.13347200 | -0.20529300 | -2.54796400 |

|    |             |             |             |
|----|-------------|-------------|-------------|
| N  | -1.97491400 | -0.56561700 | -1.99979500 |
| C  | -1.35817800 | -1.82437000 | -2.40210000 |
| H  | -1.98485100 | -2.21575900 | -3.20726000 |
| H  | -0.36345200 | -1.61792900 | -2.80681300 |
| Ag | -1.26587800 | -0.53642300 | 0.95849900  |
| Ag | 0.61704300  | 0.52487800  | -0.78537300 |
| P  | -1.13530400 | -1.58707300 | 3.10661200  |
| C  | 5.26546000  | 0.60796300  | -0.14242600 |
| C  | 6.14507700  | 0.06976100  | -1.09650300 |
| C  | 5.80645100  | 1.17364000  | 1.02433300  |
| C  | 7.52071100  | 0.09750200  | -0.88785200 |
| H  | 5.73456300  | -0.36605500 | -2.00254900 |
| C  | 7.18250100  | 1.19886800  | 1.22872200  |
| H  | 5.13181900  | 1.59435800  | 1.76424300  |
| C  | 8.04636700  | 0.66109200  | 0.27472700  |
| H  | 8.18701100  | -0.32055500 | -1.63806000 |
| H  | 7.58353700  | 1.64303700  | 2.13602600  |
| H  | 9.12081800  | 0.68382200  | 0.43475100  |
| C  | -2.71175400 | 2.52377800  | -0.30448900 |
| C  | -3.98675900 | 3.08166200  | -0.14644100 |
| C  | -1.62011400 | 3.15383800  | 0.30584600  |
| C  | -4.16438100 | 4.23478000  | 0.61229800  |
| H  | -4.83427700 | 2.60298800  | -0.62719800 |
| C  | -1.80033500 | 4.30353700  | 1.06952900  |
| H  | -0.61691300 | 2.75833200  | 0.16828400  |
| C  | -3.07350600 | 4.84831400  | 1.22733800  |
| H  | -5.15927000 | 4.65727400  | 0.72318500  |
| H  | -0.93943800 | 4.78120000  | 1.52861800  |
| H  | -3.21294700 | 5.75109100  | 1.81533800  |
| C  | -1.27466100 | -2.80097200 | -1.24893600 |
| C  | -0.03961300 | -3.18417300 | -0.72167800 |
| C  | -2.44961900 | -3.30077100 | -0.67444600 |
| C  | 0.02336000  | -4.06244800 | 0.36187100  |
| H  | 0.87732500  | -2.78280900 | -1.14657200 |
| C  | -2.38818600 | -4.17488000 | 0.40725800  |
| H  | -3.41231800 | -2.99615200 | -1.07917100 |
| C  | -1.14950200 | -4.55987000 | 0.92632800  |
| H  | 0.99077700  | -4.35526000 | 0.75984600  |
| H  | -3.30538500 | -4.56677000 | 0.83825500  |
| H  | -1.10131100 | -5.25646200 | 1.75931200  |
| H  | -1.18655200 | -0.80653000 | 4.27400200  |
| H  | -2.08306300 | -2.56624700 | 3.44423600  |
| H  | 0.04059800  | -2.30921400 | 3.36465800  |

|                                              |              |
|----------------------------------------------|--------------|
| Zero-point correction=                       | 0.372500     |
| (Hartree/Particle)                           |              |
| Thermal correction to Energy=                | 0.401421     |
| Thermal correction to Enthalpy=              | 0.402366     |
| Thermal correction to Gibbs Free Energy=     | 0.304844     |
| Sum of electronic and zero-point Energies=   | -1687.321504 |
| Sum of electronic and thermal Energies=      | -1687.292582 |
| Sum of electronic and thermal Enthalpies=    | -1687.291638 |
| Sum of electronic and thermal Free Energies= | -1687.389159 |

**Ag<sub>2</sub>\_A\_RL**

|    |             |             |             |
|----|-------------|-------------|-------------|
| C  | -2.43450500 | -2.29080700 | 0.10969900  |
| C  | -3.56954200 | -1.79888700 | 0.04157500  |
| C  | 1.63000800  | -2.76125000 | 0.22370100  |
| C  | 2.81068400  | -2.43112100 | 0.17410800  |
| Ag | -0.41202800 | -2.82654400 | 0.19084400  |
| Ag | -1.59297100 | -0.22477600 | 0.01190500  |
| P  | 0.10724100  | 1.46168500  | -0.06196800 |
| C  | -4.94495600 | -1.37639300 | -0.03009900 |
| C  | -5.66883300 | -1.11695200 | 1.14297200  |
| C  | -5.57256200 | -1.21569800 | -1.27412100 |
| C  | -6.99621400 | -0.70626100 | 1.06960100  |
| H  | -5.18218000 | -1.24549900 | 2.10509300  |
| C  | -6.89997500 | -0.80444900 | -1.34083200 |
| H  | -5.01183900 | -1.42028000 | -2.18126900 |
| C  | -7.61399500 | -0.54770900 | -0.17060100 |
| H  | -7.54974400 | -0.51101700 | 1.98360700  |
| H  | -7.37882300 | -0.68503400 | -2.30843500 |
| H  | -8.65064600 | -0.22769800 | -0.22548800 |
| C  | 4.16966700  | -1.98857100 | 0.08113500  |
| C  | 4.68305200  | -1.05804100 | 1.00017400  |
| C  | 5.00397500  | -2.42681700 | -0.96054500 |
| C  | 5.97858500  | -0.56762600 | 0.87018300  |
| H  | 4.04591900  | -0.70988800 | 1.80732600  |
| C  | 6.29937200  | -1.93448500 | -1.08777200 |
| H  | 4.61564500  | -3.14651400 | -1.67510100 |
| C  | 6.79299600  | -0.99914800 | -0.17719300 |
| H  | 6.35364400  | 0.15555200  | 1.59011900  |
| H  | 6.92935700  | -2.28351900 | -1.90207700 |
| H  | 7.80457500  | -0.61558700 | -0.27946400 |
| C  | 1.43157300  | 0.96227000  | -1.20891800 |
| C  | 2.78000600  | 1.20451500  | -0.93049500 |
| C  | 1.07793800  | 0.29746400  | -2.38742500 |
| C  | 3.76173900  | 0.79057500  | -1.82570600 |
| H  | 3.07080800  | 1.68806300  | -0.00221200 |
| C  | 2.06081200  | -0.10798700 | -3.28408500 |
| H  | 0.03387200  | 0.07591800  | -2.59783400 |

|   |             |             |             |
|---|-------------|-------------|-------------|
| C | 3.40330300  | 0.13626800  | -3.00123500 |
| H | 4.80935300  | 0.94306300  | -1.58355800 |
| H | 1.77957500  | -0.63723700 | -4.18955500 |
| H | 4.17407900  | -0.20623300 | -3.68534200 |
| C | 0.92940400  | 1.62474900  | 1.56207500  |
| C | 1.11319900  | 2.85648600  | 2.19466400  |
| C | 1.37810500  | 0.44966700  | 2.18014300  |
| C | 1.74083100  | 2.91329800  | 3.43902000  |
| H | 0.77080800  | 3.77344800  | 1.72350100  |
| C | 2.00667600  | 0.51448800  | 3.41922700  |
| H | 1.26517100  | -0.51477700 | 1.68670000  |
| C | 2.18719300  | 1.74499200  | 4.05166800  |
| H | 1.88089700  | 3.87395800  | 3.92625600  |
| H | 2.35463500  | -0.40135600 | 3.88864700  |
| H | 2.67529300  | 1.79210900  | 5.02099500  |
| C | -0.36527600 | 3.15982400  | -0.53386800 |
| C | 0.47053400  | 3.97493100  | -1.30281300 |
| C | -1.59044300 | 3.66134600  | -0.07997600 |
| C | 0.08637200  | 5.27946000  | -1.60678400 |
| H | 1.41770000  | 3.59022900  | -1.67065300 |
| C | -1.96648100 | 4.96892900  | -0.37450300 |
| H | -2.25155000 | 3.02819300  | 0.50825000  |
| C | -1.12791100 | 5.77894400  | -1.13961800 |
| H | 0.73759700  | 5.90518100  | -2.21011900 |
| H | -2.91633000 | 5.35246700  | -0.01355200 |
| H | -1.42349300 | 6.79718000  | -1.37565000 |

|                                              |              |
|----------------------------------------------|--------------|
| Zero-point correction=                       | 0.482889     |
| (Hartree/Particle)                           |              |
| Thermal correction to Energy=                | 0.517971     |
| Thermal correction to Enthalpy=              | 0.518915     |
| Thermal correction to Gibbs Free Energy=     | 0.407661     |
| Sum of electronic and zero-point Energies=   | -1945.054856 |
| Sum of electronic and thermal Energies=      | -1945.019774 |
| Sum of electronic and thermal Enthalpies=    | -1945.018830 |
| Sum of electronic and thermal Free Energies= | -1945.130084 |

### Ag<sub>2</sub>\_TS<sub>AD</sub>\_RL

|   |             |             |             |
|---|-------------|-------------|-------------|
| C | 2.80659200  | -0.75420300 | 0.05437900  |
| C | 4.06869600  | -0.68805000 | 0.01175400  |
| C | -0.52858500 | -3.11918800 | -0.72813400 |
| C | -1.69770000 | -3.47279100 | -0.83240500 |
| N | 4.68811500  | 1.01707400  | -0.21092200 |
| N | 3.95510000  | 1.94344000  | -0.17958500 |
| N | 2.72526300  | 2.22198000  | -0.06035700 |
| C | 2.40848100  | 3.65341200  | -0.02323200 |



|    |             |             |             |
|----|-------------|-------------|-------------|
| H  | 2.12091700  | 3.91760600  | 1.00323400  |
| H  | 3.30870100  | 4.22782500  | -0.26777700 |
| Ag | 1.18376900  | -2.07139400 | -0.33478800 |
| Ag | 1.18866700  | 0.62341800  | 0.37599900  |
| P  | -1.21154800 | 0.90548900  | 0.74468800  |
| C  | 5.27353700  | -1.51554700 | 0.04215600  |
| C  | 5.19344600  | -2.82919700 | -0.44465100 |
| C  | 6.48637400  | -1.05378200 | 0.56249500  |
| C  | 6.30740400  | -3.66029700 | -0.41116900 |
| H  | 4.25521600  | -3.18801000 | -0.85750200 |
| C  | 7.59737000  | -1.89309400 | 0.59897200  |
| H  | 6.55746500  | -0.04004300 | 0.94057500  |
| C  | 7.51389400  | -3.19553700 | 0.11188500  |
| H  | 6.23178600  | -4.67245300 | -0.79816500 |
| H  | 8.53215200  | -1.52396500 | 1.01141400  |
| H  | 8.38366700  | -3.84591900 | 0.13816400  |
| C  | -3.08882800 | -3.80840400 | -0.88960500 |
| C  | -4.00064500 | -2.94017300 | -1.51336300 |
| C  | -3.58355600 | -4.96770000 | -0.27122000 |
| C  | -5.36433400 | -3.21404700 | -1.50161900 |
| H  | -3.62593700 | -2.03786400 | -1.98767600 |
| C  | -4.94885600 | -5.23829600 | -0.26152900 |
| H  | -2.88442300 | -5.64285200 | 0.21338600  |
| C  | -5.84688400 | -4.36180300 | -0.87161800 |
| H  | -6.05455500 | -2.52677700 | -1.98447800 |
| H  | -5.31518700 | -6.13863400 | 0.22505600  |
| H  | -6.91251000 | -4.57425600 | -0.86126500 |
| C  | 1.27950400  | 4.04376300  | -0.95593800 |
| C  | 0.72828900  | 5.32402800  | -0.82630100 |
| C  | 0.74959400  | 3.17760800  | -1.91174400 |
| C  | -0.34625400 | 5.71931500  | -1.61643500 |
| H  | 1.13153000  | 6.00922000  | -0.08261300 |
| C  | -0.34026800 | 3.56507800  | -2.69265500 |
| H  | 1.17829500  | 2.18905100  | -2.04590200 |
| C  | -0.89474700 | 4.83198300  | -2.54446900 |
| H  | -0.76752700 | 6.71399500  | -1.49810100 |
| H  | -0.76286700 | 2.86296900  | -3.40576900 |
| H  | -1.74955900 | 5.12750500  | -3.14591200 |
| C  | -1.96993800 | -0.54753400 | 1.54316600  |
| C  | -3.28956400 | -0.92018900 | 1.27206900  |
| C  | -1.20430400 | -1.31469300 | 2.42547600  |
| C  | -3.83367600 | -2.05104800 | 1.87190400  |
| H  | -3.88704300 | -0.34850700 | 0.56765700  |
| C  | -1.75384900 | -2.43916400 | 3.03412000  |
| H  | -0.16600700 | -1.05324200 | 2.61816800  |
| C  | -3.06657900 | -2.81033200 | 2.75236200  |
| H  | -4.84410300 | -2.36049200 | 1.62062600  |
| H  | -1.14568300 | -3.04135600 | 3.70243100  |
| H  | -3.48687500 | -3.70613300 | 3.20013800  |
| C  | -2.10327700 | 1.06781300  | -0.84789700 |
| C  | -3.12694100 | 1.99426700  | -1.05882100 |
| C  | -1.73244500 | 0.20576900  | -1.88714000 |

|   |             |             |             |
|---|-------------|-------------|-------------|
| C | -3.76202200 | 2.06801100  | -2.29757100 |
| H | -3.43046400 | 2.66816300  | -0.26360700 |
| C | -2.37415100 | 0.27561300  | -3.11993100 |
| H | -0.96565000 | -0.54860500 | -1.72973200 |
| C | -3.38664100 | 1.21177400  | -3.33015100 |
| H | -4.55283000 | 2.79684500  | -2.45165500 |
| H | -2.08365000 | -0.40931500 | -3.91142500 |
| H | -3.88358000 | 1.26975900  | -4.29456100 |
| C | -1.75640900 | 2.33540800  | 1.74588500  |
| C | -2.39433500 | 2.18507100  | 2.97951900  |
| C | -1.47167900 | 3.62136500  | 1.27165000  |
| C | -2.74080600 | 3.31063600  | 3.72803400  |
| H | -2.62354500 | 1.19365600  | 3.35957900  |
| C | -1.82809800 | 4.74127800  | 2.01391600  |
| H | -0.98650000 | 3.74983100  | 0.30918800  |
| C | -2.46112700 | 4.58773900  | 3.24814400  |
| H | -3.23457400 | 3.18438600  | 4.68724600  |
| H | -1.61070400 | 5.73200600  | 1.62434000  |
| H | -2.73669900 | 5.46149300  | 3.83198400  |

|                                              |              |
|----------------------------------------------|--------------|
| Zero-point correction=                       | 0.617904     |
| (Hartree/Particle)                           |              |
| Thermal correction to Energy=                | 0.661434     |
| Thermal correction to Enthalpy=              | 0.662379     |
| Thermal correction to Gibbs Free Energy=     | 0.534149     |
| Sum of electronic and zero-point Energies=   | -2379.910368 |
| Sum of electronic and thermal Energies=      | -2379.866837 |
| Sum of electronic and thermal Enthalpies=    | -2379.865893 |
| Sum of electronic and thermal Free Energies= | -2379.994123 |

### Ag<sub>2</sub>D\_RL

|    |             |             |             |
|----|-------------|-------------|-------------|
| C  | 3.00374300  | -0.12817900 | -0.20592800 |
| C  | 3.87051400  | 0.40770500  | 0.75892900  |
| C  | -0.33651300 | -2.41250500 | 1.12830000  |
| C  | -1.49450000 | -2.57737400 | 1.49838400  |
| N  | 5.16200600  | 0.25720800  | 0.35596800  |
| N  | 5.16904400  | -0.33566200 | -0.80154800 |
| N  | 3.90425000  | -0.56648400 | -1.14819500 |
| C  | 3.63696300  | -1.14941800 | -2.45970700 |
| H  | 3.26466800  | -0.36179900 | -3.12380000 |
| H  | 4.61005100  | -1.47537000 | -2.83656500 |
| Ag | 1.42497700  | -1.60360700 | 0.45546000  |
| Ag | 1.13622500  | 0.86714800  | -0.70963100 |
| P  | -1.13970900 | 1.60472900  | -0.84634000 |
| C  | 3.55765400  | 1.11136600  | 2.01873800  |
| C  | 2.36600700  | 0.89252400  | 2.72182400  |

|   |             |             |             |
|---|-------------|-------------|-------------|
| C | 4.47414900  | 2.04201400  | 2.52584200  |
| C | 2.09256100  | 1.59522200  | 3.89192000  |
| H | 1.64826700  | 0.15322200  | 2.37408600  |
| C | 4.20013800  | 2.74174000  | 3.69750000  |
| H | 5.40393200  | 2.20869700  | 1.99092700  |
| C | 3.00634600  | 2.52482300  | 4.38459200  |
| H | 1.16821000  | 1.39569200  | 4.42688000  |
| H | 4.92311500  | 3.45995100  | 4.07447800  |
| H | 2.79586600  | 3.06690800  | 5.30243200  |
| C | -2.85019700 | -2.70164500 | 1.94308500  |
| C | -3.91151000 | -2.69913500 | 1.02257900  |
| C | -3.15499300 | -2.77472200 | 3.31249800  |
| C | -5.23251100 | -2.75208500 | 1.45720900  |
| H | -3.68856600 | -2.63806500 | -0.03832500 |
| C | -4.47686000 | -2.83042800 | 3.74378100  |
| H | -2.34103900 | -2.77515800 | 4.03114400  |
| C | -5.52294500 | -2.81545000 | 2.82027600  |
| H | -6.03852400 | -2.74511700 | 0.72791100  |
| H | -4.69198000 | -2.88732300 | 4.80773900  |
| H | -6.55417000 | -2.86040300 | 3.15975800  |
| C | 2.65434000  | -2.29369200 | -2.40268200 |
| C | 1.42404200  | -2.20686800 | -3.05306300 |
| C | 2.96099000  | -3.44752300 | -1.67162300 |
| C | 0.50998400  | -3.25765700 | -2.97879100 |
| H | 1.16929500  | -1.30832900 | -3.61155000 |
| C | 2.04375900  | -4.49050300 | -1.58628000 |
| H | 3.91675600  | -3.51725500 | -1.15672600 |
| C | 0.81479000  | -4.39630000 | -2.24032600 |
| H | -0.44513800 | -3.17211800 | -3.48752300 |
| H | 2.28243000  | -5.37319100 | -1.00068200 |
| H | 0.09361900  | -5.20406100 | -2.16061900 |
| C | -1.88508900 | 1.41511300  | 0.80932500  |
| C | -3.09019600 | 0.74202400  | 1.01855600  |
| C | -1.18850500 | 1.94504000  | 1.90272000  |
| C | -3.59609300 | 0.59817500  | 2.30853000  |
| H | -3.62700600 | 0.29917600  | 0.18532000  |
| C | -1.70679000 | 1.81650400  | 3.18641800  |
| H | -0.23399800 | 2.44775100  | 1.75821200  |
| C | -2.90866700 | 1.13838700  | 3.39086900  |
| H | -4.51369000 | 0.03818800  | 2.46439200  |
| H | -1.16411600 | 2.23432500  | 4.02922000  |
| H | -3.30038400 | 1.01481800  | 4.39640700  |
| C | -2.13509000 | 0.53881200  | -1.94694400 |
| C | -3.00006700 | 1.05657300  | -2.91489700 |
| C | -2.01776400 | -0.84880300 | -1.78990400 |
| C | -3.74680900 | 0.19420300  | -3.71696100 |
| H | -3.09859800 | 2.13027800  | -3.04653500 |
| C | -2.77747800 | -1.70192800 | -2.58371300 |
| H | -1.36200500 | -1.27073600 | -1.02959600 |
| C | -3.64054900 | -1.18470700 | -3.54951700 |
| H | -4.41719900 | 0.60308400  | -4.46741600 |
| H | -2.69254800 | -2.77558400 | -2.43908900 |

|   |             |             |             |
|---|-------------|-------------|-------------|
| H | -4.23019600 | -1.85460100 | -4.16900200 |
| C | -1.50833600 | 3.31611100  | -1.35389200 |
| C | -2.63465700 | 3.99499700  | -0.87656800 |
| C | -0.65399100 | 3.95010300  | -2.26136300 |
| C | -2.90396400 | 5.29048500  | -1.31007100 |
| H | -3.29624900 | 3.51405400  | -0.16094500 |
| C | -0.92853300 | 5.24371500  | -2.69877700 |
| H | 0.23241000  | 3.43386200  | -2.62368000 |
| C | -2.05363400 | 5.91428700  | -2.22249500 |
| H | -3.77724300 | 5.81368600  | -0.93176200 |
| H | -0.25891400 | 5.73011400  | -3.40186900 |
| H | -2.26346000 | 6.92651700  | -2.55588400 |

|                                              |                             |
|----------------------------------------------|-----------------------------|
| Zero-point correction=                       | 0.623515 (Hartree/Particle) |
| Thermal correction to Energy=                | 0.666315                    |
| Thermal correction to Enthalpy=              | 0.667259                    |
| Thermal correction to Gibbs Free Energy=     | 0.538742                    |
| Sum of electronic and zero-point Energies=   | -2380.039345                |
| Sum of electronic and thermal Energies=      | -2379.996545                |
| Sum of electronic and thermal Enthalpies=    | -2379.995601                |
| Sum of electronic and thermal Free Energies= | -2380.124118                |

### Ag<sub>1</sub>A<sub>1</sub>RL

|    |             |             |             |
|----|-------------|-------------|-------------|
| Ag | 0.87003000  | 0.00578500  | 0.00291500  |
| P  | -1.52470300 | 0.00065400  | 0.00132900  |
| C  | -2.27282200 | 1.65991300  | -0.17202400 |
| C  | -3.42672300 | 2.04209600  | 0.51868100  |
| H  | -3.89984300 | 1.35528500  | 1.21493100  |
| C  | -3.97127700 | 3.30991500  | 0.32215800  |
| H  | -4.86508600 | 3.60134200  | 0.86617900  |
| C  | -3.37040100 | 4.20034700  | -0.56528200 |
| H  | -3.79546700 | 5.18863800  | -0.71496300 |
| C  | -2.21673100 | 3.82574400  | -1.25314700 |
| H  | -1.73846300 | 4.51972100  | -1.93784900 |
| C  | -1.66596100 | 2.56342800  | -1.05247800 |
| C  | -2.26314500 | -0.98064800 | -1.35315400 |
| C  | -1.64555500 | -2.18837300 | -1.69911500 |
| H  | -0.73433300 | -2.49813200 | -1.19198700 |
| C  | -2.18775000 | -2.99411100 | -2.69608400 |
| H  | -1.70069500 | -3.92867100 | -2.95790600 |
| C  | -3.34373200 | -2.59298000 | -3.36472600 |
| H  | -3.76204500 | -3.21717000 | -4.14908200 |
| C  | -3.95561400 | -1.38572800 | -3.03339400 |
| H  | -4.85134900 | -1.06596400 | -3.55799100 |
| C  | -3.41952900 | -0.58086900 | -2.02976100 |
| H  | -3.90118100 | 0.36058000  | -1.78052000 |
| C  | -2.26847000 | -0.68387600 | 1.52465800  |

|   |             |             |             |
|---|-------------|-------------|-------------|
| C | -3.42943200 | -1.46297300 | 1.51132400  |
| H | -3.91044300 | -1.71122600 | 0.56928900  |
| C | -3.97094700 | -1.93093000 | 2.70714400  |
| H | -4.87029100 | -2.53972300 | 2.68833100  |
| C | -3.35974700 | -1.62237900 | 3.92081800  |
| H | -3.78221700 | -1.99052300 | 4.85131100  |
| C | -2.19919600 | -0.84975100 | 3.93930900  |
| H | -1.71272000 | -0.61565700 | 4.88150100  |
| C | -1.65162200 | -0.38787000 | 2.74592400  |
| H | -0.73695500 | 0.20078000  | 2.76482600  |
| H | -0.75691100 | 2.28198700  | -1.57964800 |
| C | 4.13112100  | 0.00490900  | 0.00273100  |
| C | 2.90576000  | 0.00622800  | 0.00288500  |
| C | 5.56462400  | 0.00328600  | 0.00179300  |
| C | 6.28124900  | -1.20499700 | -0.00917000 |
| C | 6.28406200  | 1.20990000  | 0.01144000  |
| C | 7.67281100  | -1.20410500 | -0.01042900 |
| H | 5.73117100  | -2.14131200 | -0.01659200 |
| C | 7.67562300  | 1.20576400  | 0.01013900  |
| H | 5.73616400  | 2.14748200  | 0.02000100  |
| C | 8.37670000  | 0.00001500  | -0.00083800 |
| H | 8.21085100  | -2.14846300 | -0.01898700 |
| H | 8.21587500  | 2.14886500  | 0.01770200  |
| H | 9.46328400  | -0.00125300 | -0.00189500 |

|                                              |              |
|----------------------------------------------|--------------|
| Zero-point correction=                       | 0.380065     |
| (Hartree/Particle)                           |              |
| Thermal correction to Energy=                | 0.405639     |
| Thermal correction to Enthalpy=              | 0.406583     |
| Thermal correction to Gibbs Free Energy=     | 0.316169     |
| Sum of electronic and zero-point Energies=   | -1490.416793 |
| Sum of electronic and thermal Energies=      | -1490.391219 |
| Sum of electronic and thermal Enthalpies=    | -1490.390275 |
| Sum of electronic and thermal Free Energies= | -1490.480689 |

### AgI\_TSAD\_RL

|    |             |             |             |
|----|-------------|-------------|-------------|
| C  | 2.83648900  | 0.70201200  | -0.18748000 |
| C  | 3.97191300  | 0.14721900  | -0.22946800 |
| N  | 3.77409400  | -1.61385300 | -0.73674300 |
| N  | 2.70708800  | -2.07206700 | -0.98815500 |
| N  | 1.49139400  | -1.69251200 | -1.02849600 |
| C  | 0.54560500  | -2.71988900 | -1.45284000 |
| H  | -0.07960800 | -2.28205100 | -2.24259200 |
| H  | 1.08064400  | -3.56706800 | -1.89787800 |
| Ag | 0.80403000  | 0.47926800  | -0.35711700 |

|   |             |             |             |
|---|-------------|-------------|-------------|
| P | -1.53932400 | 0.91577600  | -0.07138500 |
| C | 5.40133700  | 0.34198400  | -0.01107600 |
| C | 5.82071000  | 1.29740400  | 0.92719200  |
| C | 6.36834400  | -0.37641700 | -0.72335900 |
| C | 7.17484100  | 1.52814800  | 1.14461800  |
| H | 5.07202400  | 1.85215800  | 1.48489700  |
| C | 7.72319100  | -0.14084300 | -0.50294600 |
| H | 6.05368300  | -1.11842300 | -1.44831000 |
| C | 8.13321100  | 0.80929200  | 0.43008500  |
| H | 7.48278500  | 2.26984000  | 1.87656800  |
| H | 8.46195300  | -0.70440800 | -1.06639500 |
| H | 9.19119700  | 0.98847400  | 0.60050800  |
| C | -0.37661700 | -3.21915800 | -0.35460600 |
| C | -1.34794500 | -4.17214400 | -0.68250000 |
| C | -0.33351400 | -2.72922500 | 0.94959700  |
| C | -2.27085100 | -4.60647800 | 0.26277500  |
| H | -1.39092000 | -4.56381500 | -1.69739800 |
| C | -1.26674500 | -3.15227100 | 1.89804300  |
| H | 0.42634800  | -2.00377200 | 1.22385500  |
| C | -2.24147200 | -4.08545500 | 1.55846200  |
| H | -3.01857700 | -5.34632900 | -0.01081100 |
| H | -1.23411500 | -2.73804500 | 2.90181600  |
| H | -2.96949700 | -4.41037300 | 2.29633700  |
| C | -2.00008600 | 2.68518500  | -0.18382300 |
| C | -3.32489800 | 3.10606700  | -0.01053700 |
| C | -1.00802700 | 3.63433000  | -0.44017800 |
| C | -3.64948800 | 4.45492700  | -0.09522400 |
| H | -4.10728800 | 2.37751600  | 0.18431700  |
| C | -1.33455100 | 4.98835500  | -0.52527300 |
| H | 0.02409700  | 3.31715800  | -0.57105200 |
| C | -2.65304500 | 5.39866500  | -0.35289200 |
| H | -4.67948500 | 4.77204400  | 0.04062800  |
| H | -0.55576300 | 5.71826900  | -0.72536700 |
| H | -2.90752400 | 6.45263700  | -0.41970100 |
| C | -2.11248600 | 0.41044200  | 1.59455400  |
| C | -3.43700500 | 0.06414300  | 1.88001500  |
| C | -1.16899700 | 0.40454600  | 2.62769600  |
| C | -3.80790200 | -0.28740800 | 3.17521300  |
| H | -4.18234700 | 0.04763400  | 1.08999400  |
| C | -1.54260700 | 0.06383400  | 3.92512200  |
| H | -0.13222300 | 0.66012300  | 2.41853000  |
| C | -2.86271000 | -0.28667600 | 4.19987900  |
| H | -4.83814000 | -0.56194600 | 3.38303800  |
| H | -0.79876800 | 0.06353000  | 4.71641700  |
| H | -3.15420500 | -0.56093800 | 5.20985700  |
| C | -2.66556100 | 0.09258800  | -1.25677200 |
| C | -3.04996800 | 0.75007200  | -2.43135000 |
| C | -3.04073900 | -1.24178400 | -1.06624000 |
| C | -3.80420500 | 0.08489700  | -3.39490800 |
| H | -2.76434300 | 1.78519600  | -2.59792700 |
| C | -3.79623100 | -1.90263500 | -2.03117100 |
| H | -2.74691600 | -1.77374500 | -0.16652800 |

|   |             |             |             |
|---|-------------|-------------|-------------|
| C | -4.17982700 | -1.24262700 | -3.19675900 |
| H | -4.09696700 | 0.60625800  | -4.30171300 |
| H | -4.07680800 | -2.93884400 | -1.86621900 |
| H | -4.76781300 | -1.76088100 | -3.94894800 |

|                                              |              |
|----------------------------------------------|--------------|
| Zero-point correction=                       | 0.515371     |
| (Hartree/Particle)                           |              |
| Thermal correction to Energy=                | 0.549359     |
| Thermal correction to Enthalpy=              | 0.550303     |
| Thermal correction to Gibbs Free Energy=     | 0.443503     |
| Sum of electronic and zero-point Energies=   | -1925.261374 |
| Sum of electronic and thermal Energies=      | -1925.227386 |
| Sum of electronic and thermal Enthalpies=    | -1925.226442 |
| Sum of electronic and thermal Free Energies= | -1925.333242 |

### Ag<sub>1</sub>D<sub>1</sub>RL

|    |             |             |             |
|----|-------------|-------------|-------------|
| C  | 2.57884500  | -1.27881700 | -0.37265800 |
| C  | 3.83120900  | -0.70111200 | -0.17948900 |
| N  | 4.80214200  | -1.66135000 | -0.22481000 |
| N  | 4.24054300  | -2.81159600 | -0.42208800 |
| N  | 2.91046200  | -2.59161700 | -0.50646300 |
| C  | 2.05084500  | -3.72002400 | -0.83428400 |
| H  | 1.90643000  | -3.75929100 | -1.92015000 |
| H  | 2.60461600  | -4.61664800 | -0.54014700 |
| Ag | 0.65528100  | -0.46989500 | -0.33990100 |
| P  | -1.42791600 | 0.67800500  | -0.12111700 |
| C  | 4.16844400  | 0.71613500  | 0.03638000  |
| C  | 3.28558600  | 1.58649800  | 0.69076200  |
| C  | 5.39362400  | 1.22927500  | -0.41205500 |
| C  | 3.60102800  | 2.93144400  | 0.86891800  |
| H  | 2.34970800  | 1.19927400  | 1.08684700  |
| C  | 5.71381100  | 2.57172600  | -0.22705000 |
| H  | 6.09001500  | 0.56021800  | -0.90960100 |
| C  | 4.81797600  | 3.43233200  | 0.40837800  |
| H  | 2.90089500  | 3.58173200  | 1.38812600  |
| H  | 6.66855700  | 2.94991100  | -0.58494400 |
| H  | 5.07067500  | 4.47959500  | 0.55328800  |
| C  | 0.71081600  | -3.65139000 | -0.13909700 |
| C  | -0.47314100 | -3.64626800 | -0.87786200 |
| C  | 0.63570500  | -3.56008800 | 1.25532200  |
| C  | -1.71183700 | -3.53570800 | -0.24228800 |
| H  | -0.42522000 | -3.71476900 | -1.96288900 |
| C  | -0.59622900 | -3.44379200 | 1.88980200  |
| H  | 1.55441800  | -3.54676600 | 1.83643700  |
| C  | -1.77541700 | -3.42516500 | 1.14267100  |

|   |             |             |             |
|---|-------------|-------------|-------------|
| H | -2.62559600 | -3.52241800 | -0.83120700 |
| H | -0.64060600 | -3.35487900 | 2.97166700  |
| H | -2.73471700 | -3.30886900 | 1.63940000  |
| C | -1.18044200 | 2.43905700  | 0.29745400  |
| C | -2.08245600 | 3.15885400  | 1.08919800  |
| C | -0.04208000 | 3.07929700  | -0.20609100 |
| C | -1.85256200 | 4.50561300  | 1.36051900  |
| H | -2.95872400 | 2.66682900  | 1.50354600  |
| C | 0.18184600  | 4.42717700  | 0.06174000  |
| H | 0.68421900  | 2.52434600  | -0.79586400 |
| C | -0.72372100 | 5.14132200  | 0.84389900  |
| H | -2.55341900 | 5.05815600  | 1.97976800  |
| H | 1.07216800  | 4.90938600  | -0.33089800 |
| H | -0.54551600 | 6.19092500  | 1.05961900  |
| C | -2.48663100 | 0.02970800  | 1.22120300  |
| C | -3.83081100 | -0.30023200 | 1.03911900  |
| C | -1.89194800 | -0.16848100 | 2.47301500  |
| C | -4.57257000 | -0.82071500 | 2.10017400  |
| H | -4.30322000 | -0.15949000 | 0.07106700  |
| C | -2.63622800 | -0.67466600 | 3.53254700  |
| H | -0.83883300 | 0.06266600  | 2.61747100  |
| C | -3.97895400 | -1.00547600 | 3.34632500  |
| H | -5.61729900 | -1.07731900 | 1.94962600  |
| H | -2.16588800 | -0.82211800 | 4.50030500  |
| H | -4.55876100 | -1.40927300 | 4.17144500  |
| C | -2.48868000 | 0.67148800  | -1.60779900 |
| C | -3.31796100 | 1.74519400  | -1.94564200 |
| C | -2.47119600 | -0.46815900 | -2.42010300 |
| C | -4.12830700 | 1.67350700  | -3.07673200 |
| H | -3.32594700 | 2.64292800  | -1.33337900 |
| C | -3.28830000 | -0.54097200 | -3.54511000 |
| H | -1.81206700 | -1.29687600 | -2.17207600 |
| C | -4.11799600 | 0.53012700  | -3.87393400 |
| H | -4.76483800 | 2.51409000  | -3.33714400 |
| H | -3.26793500 | -1.42859800 | -4.17096100 |
| H | -4.74820400 | 0.47803100  | -4.75711600 |

|                                              |              |
|----------------------------------------------|--------------|
| Zero-point correction=                       | 0.521109     |
| (Hartree/Particle)                           |              |
| Thermal correction to Energy=                | 0.554005     |
| Thermal correction to Enthalpy=              | 0.554949     |
| Thermal correction to Gibbs Free Energy=     | 0.451236     |
| Sum of electronic and zero-point Energies=   | -1925.402964 |
| Sum of electronic and thermal Energies=      | -1925.370068 |
| Sum of electronic and thermal Enthalpies=    | -1925.369124 |
| Sum of electronic and thermal Free Energies= | -1925.472837 |
